# Supplementary material for: Ocean acidification influences host DNA methylation and phenotypic plasticity in environmentally susceptible corals
Source: PubMed Central journal article supplement (PMC5039329; doi:10.1111/eva.12408), 2016-08-02

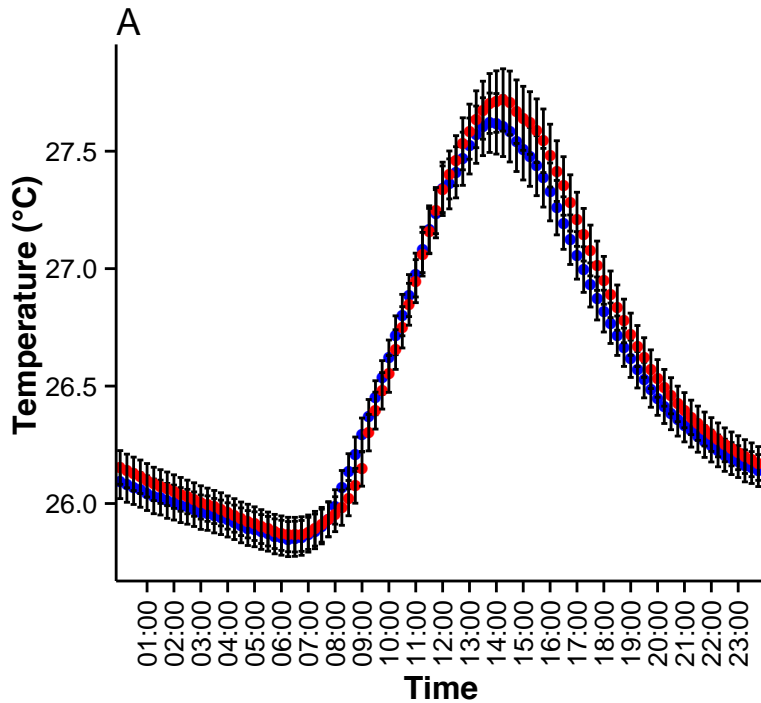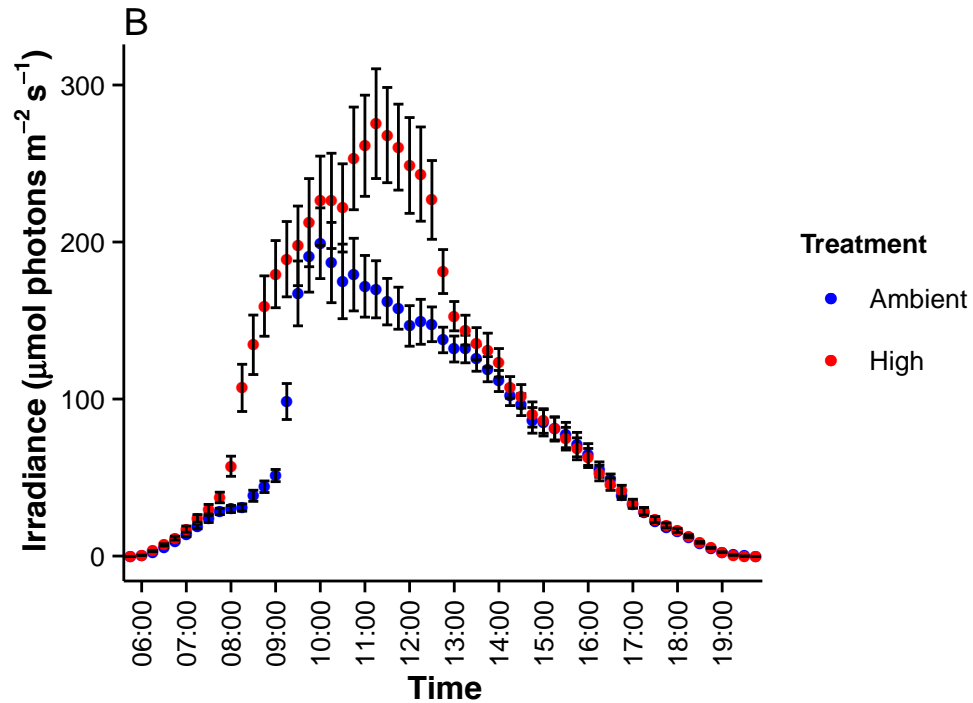

Supplement: EVA-9-1165-s002.pdf [file EVA-9-1165-s002.pdf]
